# Supplementary material
Source: publisher figshare collection journal article supplement (https://tandf.figshare.com/articles/dataset/_/9805367)
Supplement: Supplementary file 1 [file 3]

# Supplemental Material for JCGS-18-113 Entitled “A Logistic Factorization Model for Recommender Systems with Multinomial Responses”

Table 1: Comparison of the root mean square error of different methods. RSVD, RBM, RB, SI, GS, TML, and TMLCI stand for the regularized singular value decomposition method [24], the restricted Boltzmann machine [38], the regression-based latent factor model [3], the Soft-Impute method [28], the group-specific recommender system [8], the proposed two-way multinomial logistic model, and the proposed two-way multinomial logistic model with covariate information, respectively. The simulated data are generated in five categories by RSVD with 1500 users and 1500 items with  $K = 4$ ,  $\lambda = 6$ , and randomly generated latent factors.

| Missing rate | RSVD   | RBM    | RB     | SI     | GS     | <b>TML</b>    | <b>TMLCI</b>  |
|--------------|--------|--------|--------|--------|--------|---------------|---------------|
| 0.7          | 1.0456 | 1.0326 | 1.0734 | 1.0358 | 0.9738 | <b>0.9782</b> | <b>0.9530</b> |
| 0.8          | 1.0570 | 1.0404 | 1.0954 | 1.0570 | 0.9755 | <b>0.9743</b> | <b>0.9587</b> |
| 0.9          | 1.0726 | 1.0652 | 1.1177 | 1.0652 | 0.9800 | <b>0.9831</b> | <b>0.9636</b> |
| 0.95         | 1.1056 | 1.1043 | 1.1290 | 1.0868 | 0.9841 | <b>0.9891</b> | <b>0.9673</b> |

## References

- [1] Aciar, S., D. Zhang, S. Simoff, and J. Debenham (2006). Recommender system based on consumer product reviews. In *Proceedings of the 2006 IEEE/WIC/ACM International Conference on Web Intelligence*, WI ’06, Washington, DC, USA, pp. 719–723. IEEE Computer Society.
- [2] Adomavicius, G. and A. Tuzhilin (2005). Toward the next generation of recommender systems: A survey of the state-of-the-art and possible extensions. *IEEE Transactions on Knowledge and Data Engineering* 17(6), 734–749.
- [3] Agarwal, D. and B.-C. Chen (2009a). Regression-based latent factor models. In *Proceedings of the 15th ACM SIGKDD International Conference on Knowledge Discovery and Data Mining*, KDD ’09, New York, NY, USA, pp. 19–28. ACM.
- [4] Agarwal, D. and B.-C. Chen (2009b). Regression-based latent factor models. In *Proceedings of the 15th ACM SIGKDD International Conference on Knowledge Discovery and Data Mining*, KDD ’09, New York, NY, USA, pp. 19–28. ACM.

- [5] Aggarwal, C. C. (2016). *Recommender systems*. Springer.
- [6] Agresti, A. and M. Kateri (2011). Categorical data analysis. In M. Lovric (Ed.), *International Encyclopedia of Statistical Science*, pp. 206–208. Springer Berlin Heidelberg. DOI: 10.1007/978-3-642-04898-2\_161.
- [7] Bell, R. M. and Y. Koren (2007). Lessons from the Netflix prize challenge. *SIGKDD Explor. Newsl.* 9(2), 75–79.
- [8] Bi, X., A. Qu, J. Wang, and X. Shen (2016). A group-specific recommender system. *Journal of the American Statistical Association*.
- [9] Blanco-Fernandez, Y., J. J. Pazos-Arias, A. Gil-Solla, M. Ramos-Cabrera, and M. Lopez-Nores (2008). Providing entertainment by content-based filtering and semantic reasoning in intelligent recommender systems. *IEEE Transactions on Consumer Electronics* 54(2).
- [10] Bobadilla, J., F. Ortega, A. Hernando, and J. Alcalá (2011). Improving collaborative filtering recommender system results and performance using genetic algorithms. *Knowledge-Based Systems* 24(8), 1310–1316.
- [11] Cacheda, F., V. Carneiro, D. Fernández, and V. Formoso (2011). Comparison of collaborative filtering algorithms: Limitations of current techniques and proposals for scalable, high-performance recommender systems. *ACM Trans. Web* 5(1), 2:1–2:33.
- [12] Cron, A., L. Zhang, and D. Agarwal (2014). Collaborative filtering for massive multinomial data. *Journal of Applied Statistics* 41(4), 701–715.
- [13] Davidson, J., B. Liebald, J. Liu, P. Nandy, T. Van Vleet, U. Gargi, S. Gupta, Y. He, M. Lambert, B. Livingston, and D. Sampath (2010). The YouTube video recommendation system. In *Proceedings of the Fourth ACM Conference on Recommender Systems, RecSys ’10*, New York, NY, USA, pp. 293–296.
- [14] Ekstrand, M. D., J. T. Riedl, and J. A. Konstan (2011). Collaborative filtering recommender systems. *Foundations and Trends in Human-Computer Interaction* 4(2), 81–173.
- [15] Ghosh, S., M. Mundhe, K. Hernandez, and S. Sen (1999). Voting for movies: the anatomy of a recommender System. In *Proceedings of the Third Annual Conference on Autonomous Agents, AGENTS ’99*, New York, NY, USA, pp. 434–435.
- [16] Goldberg, K., T. Roeder, D. Gupta, and C. Perkins (2000). Eigentaste: A constant time collaborative filtering algorithm. *Information Retrieval* 4(2), 133–151.
- [17] Gomez-Urbe, C. A. and N. Hunt (2015). The Netflix recommender system: Algorithms, business value, and innovation. *ACM Trans. Manage. Inf. Syst.* 6(4), 13:1–13:19.
- [18] Gunawardana, A. and G. Shani (2015). Evaluating recommender systems. In *Recommender Systems Handbook*, pp. 265–308. Springer.
- [19] Harper, F. M. and J. A. Konstan (2015). The MovieLens datasets: History and context. *ACM Trans. Interact. Intell. Syst.* 5(4), 19:1–19:19.

- [20] Iaquinta, L., M. De Gemmis, P. Lops, G. Semeraro, M. Filannino, and P. Molino (2008). Introducing serendipity in a content-based recommender system. In *Hybrid Intelligent Systems, 2008. HIS'08. Eighth International Conference on*, pp. 168–173. IEEE.
- [21] Kim, Y. S., B.-J. Yum, J. Song, and S. M. Kim (2005). Development of a recommender system based on navigational and behavioral patterns of customers in e-commerce sites. *Expert Systems with Applications* 28(2), 381–393.
- [22] Koenigstein, N., G. Dror, and Y. Koren (2011). Yahoo! Music recommendations: Modeling music ratings with temporal dynamics and item taxonomy. In *Proceedings of the Fifth ACM Conference on Recommender Systems, RecSys '11*, New York, NY, USA, pp. 165–172.
- [23] Koren, Y. (2010). Factor in the neighbors: Scalable and accurate collaborative filtering. *ACM Trans. Knowl. Discov. Data* 4(1), 1:1–1:24.
- [24] Koren, Y., R. Bell, and C. Volinsky (2009). Matrix factorization techniques for recommender systems. *Computer* 42(8), 30–37.
- [25] Levi, A., O. Mokryn, C. Diot, and N. Taft (2012). Finding a needle in a haystack of reviews: Cold start context-based hotel recommender system. In *Proceedings of the Sixth ACM Conference on Recommender Systems, RecSys '12*, New York, NY, USA, pp. 115–122.
- [26] Lops, P., M. De Gemmis, and G. Semeraro (2011). Content-based recommender systems: State of the art and trends. In *Recommender Systems Handbook*, pp. 73–105. Springer.
- [27] Lu, J., D. Wu, M. Mao, W. Wang, and G. Zhang (2015). Recommender system application developments: A survey. *Decision Support Systems* 74(Supplement C), 12–32.
- [28] Mazumder, R., T. Hastie, and R. Tibshirani (2010). Spectral regularization algorithms for learning large incomplete matrices. *Journal of Machine Learning Research* 11, 2287–2322.
- [29] Melville, P., R. J. Mooney, and R. Nagarajan (2002). Content-boosted collaborative filtering for improved recommendations. In *Eighteenth National Conference on Artificial Intelligence*, Menlo Park, CA, USA, pp. 187–192. American Association for Artificial Intelligence.
- [30] Miller, B. N., I. Albert, S. K. Lam, J. A. Konstan, and J. Riedl (2003). MovieLens unplugged: Experiences with an occasionally connected recommender system. In *Proceedings of the 8th International Conference on Intelligent User Interfaces, IUI '03*, New York, NY, USA, pp. 263–266. ACM.
- [31] Mirbakhsh, N. and C. X. Ling (2015). Improving top-N recommendation for cold-start users via cross-domain information. *ACM Trans. Knowl. Discov. Data* 9(4), 33:1–33:19.

- [32] Mooney, R. J. and L. Roy (2000). Content-based book recommending using learning for text categorization. In *Proceedings of the Fifth ACM Conference on Digital Libraries*, DL '00, New York, NY, USA, pp. 195–204.
- [33] Nguyen, A.-T., N. Denos, and C. Berrut (2007). Improving new user recommendations with rule-based induction on cold user data. In *Proceedings of the 2007 ACM Conference on Recommender Systems*, RecSys '07, New York, NY, USA, pp. 121–128.
- [34] Oghina, A., M. Breuss, M. Tsagkias, and M. d. Rijke (2012). Predicting IMDB movie ratings using social media. In *Advances in Information Retrieval*, Lecture Notes in Computer Science, pp. 503–507. Springer, Berlin, Heidelberg.
- [35] Park, S.-T., D. Pennock, O. Madani, N. Good, and D. DeCoste (2006). NaiVe filterbots for robust cold-start recommendations. In *Proceedings of the 12th ACM SIGKDD International Conference on Knowledge Discovery and Data Mining*, KDD '06, New York, NY, USA, pp. 699–705.
- [36] Resnick, P. and H. R. Varian (1997). Recommender systems. *Commun. ACM* 40(3), 56–58.
- [37] Ricci, F., L. Rokach, and B. Shapira (2011). Introduction to Recommender Systems Handbook. In *Recommender Systems Handbook*, pp. 1–35. Springer, Boston, MA.
- [38] Salakhutdinov, R., A. Mnih, and G. Hinton (2007). Restricted Boltzmann machines for collaborative filtering. In *Proceedings of the 24th International Conference on Machine Learning*, ICML '07, New York, NY, USA, pp. 791–798.
- [39] Spall, J. C. (2005). *Introduction to stochastic search and optimization: Estimation, simulation, and control*, Volume 65. John Wiley & Sons.
- [40] Srebro, N., N. Alon, and T. S. Jaakkola (2005). Generalization error bounds for collaborative prediction with low-rank matrices. In L. K. Saul, Y. Weiss, and L. Bottou (Eds.), *Advances in Neural Information Processing Systems 17*, pp. 1321–1328. MIT Press.
- [41] Stern, D., R. Herbrich, and T. Graepel (2009). Matchbox: Large scale bayesian recommendations. In *Proceedings of the 18th International World Wide Web Conference*.
- [42] Zhu, Y., X. Shen, and C. Ye (2016). Personalized prediction and sparsity pursuit in latent factor models. *Journal of the American Statistical Association* 111(513), 241–252.
